# Supplementary material for: Semi-field evaluation of human landing catches versus human double net trap for estimating human biting rate of Anopheles minimus and Anopheles harrisoni in Thailand
Source: PeerJ journal article supplement (doi:10.7717/peerj.13865), 2022-09-08

(A) Nightly mean temperature during the collection of *An. harrisoni* by HDNT and HLC

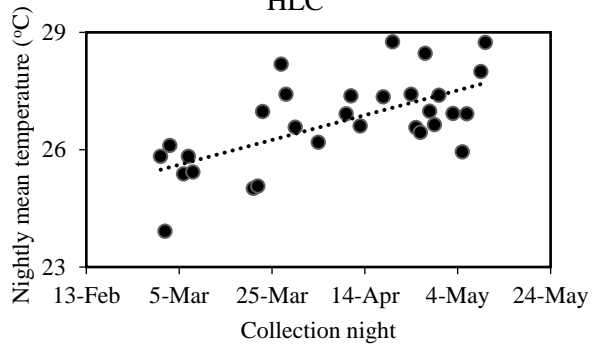

(B) *An. harrisoni* captured per night by HDNT and HLC

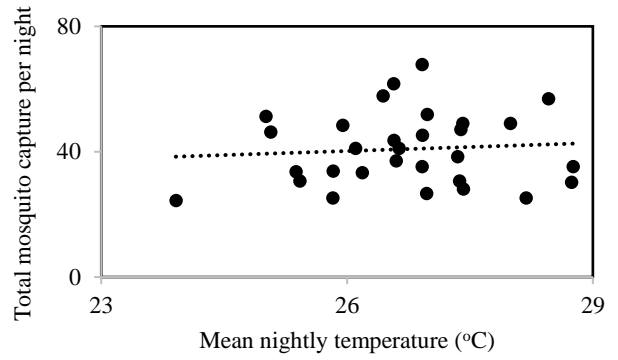

(C) Nightly mean RH during the collection of *An. harrisoni* by HDNT and HLC

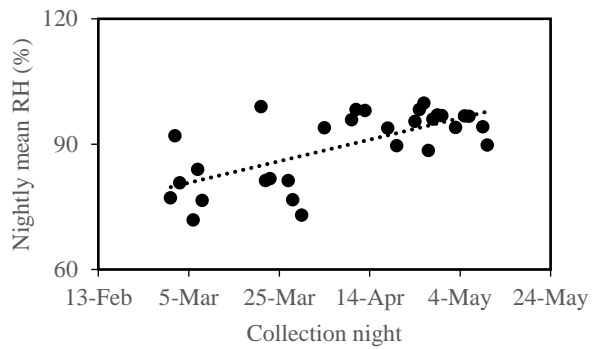

(D) *An. harrisoni* captured per night by HDNT and HLC

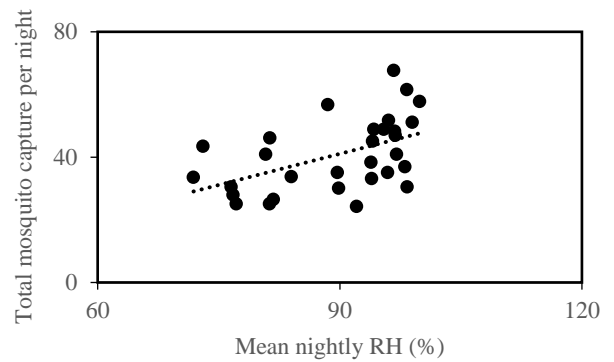

Supplement: Supp_fig_1.pdf [file Supp_fig_1.pdf]
